# Supplementary material
Source: Springer Nature journal article supplement (https://www.springermedizin.de/resource/supplementary/12901_2012_90_MOESM4_ESM.docx/9515192)
Supplement: MOESM4 [file 9515192]

|  | **500Hz** | **1KHz** | **2KHz** | **4KHz** |
| --- | --- | --- | --- | --- |
| **MHL preop (dB HL)** | 90,6 | 92,1 | 93,8 | 96,0 |
| **MHL postop (dB HL)** | 59,4 | 66,2 | 78,2 | 80,5 |

Table 3: Mean values of hearing loss (MHL) pre- and postoperatively with respect to the PTA values in 500 Hz, 1 KHz, 2 kHz, 4 kHz.
